# Supplementary material
Source: PubMed Central journal article supplement (PMC9353576)
Supplement: NIHMS1825906-supplement-SupplMaterial-1.pdf [file NIHMS1825906-supplement-SupplMaterial-1.pdf]

## Supplementary Information

### ***Porphyromonas gingivalis* indirectly elicits intestinal inflammation by altering the gut microbiota and disrupting epithelial barrier function through IL9-producing CD4<sup>+</sup> T cells**

Jiho Sohn<sup>1,2,3</sup>, Lu Li<sup>3</sup>, Lixia Zhang<sup>3</sup>, Prasad R. Settem<sup>2</sup>, Kiyonobu Honma<sup>3</sup>, Ashu Sharma<sup>3</sup>, Karen L. Falkner<sup>3</sup>, Jan M. Novak<sup>2</sup>, Yijun Sun<sup>4</sup>, and Keith L. Kirkwood<sup>2,6\*</sup>

<sup>1</sup>Genetics, Genomics, and Bioinformatics Program, <sup>2</sup>Departments of Medicine, <sup>3</sup>Oral Biology, and <sup>4</sup>Microbiology and Immunology, State University of New York at Buffalo, University at Buffalo, NY, USA, <sup>6</sup>Department of Head & Neck/Plastic & Reconstructive Surgery, Roswell Park Comprehensive Cancer Center, Buffalo, NY, USA

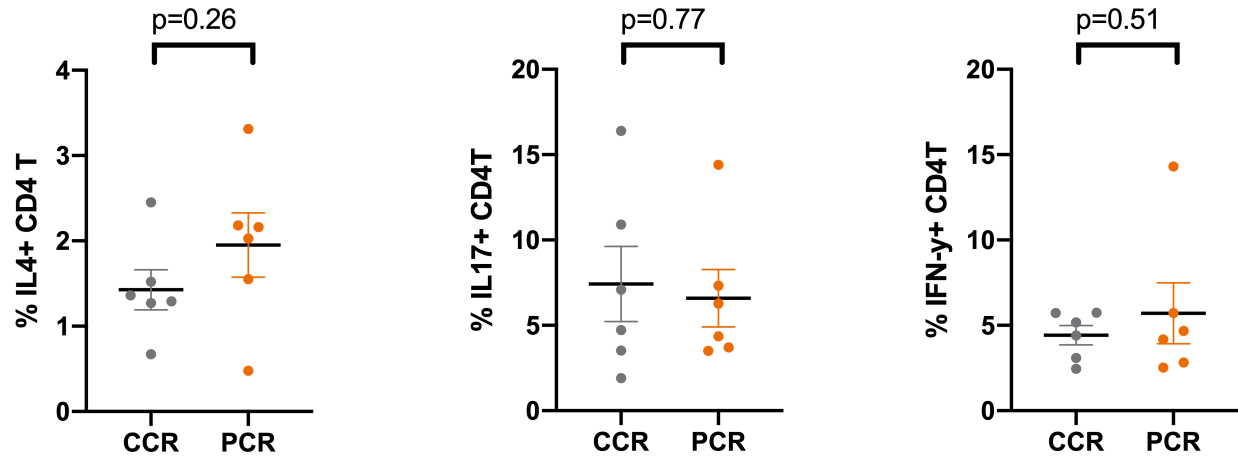

**Supplemental Figure 1.** *P. gingivalis*-altered gut microbiota does not affect % IL4<sup>+</sup> or IL17<sup>+</sup> or IFN- $\gamma$ <sup>+</sup> CD4<sup>+</sup> T cells. CD3<sup>+</sup> CD4<sup>+</sup> T cells in lamina propria of small intestine measured by flow cytometry analysis.

**Supplementary table 1.** List of genes in the custom Nanostring code set.

**Supplementary table 2.** Differentially abundant bacterial (16S) taxa in mice inoculated with *P. gingivalis*.

**Supplementary table 3.** Differentially abundant fungal (ITS) taxa in mice inoculated with *P. gingivalis*.

**Supplementary table 4.** Differentially abundant bacterial (16S) taxa in *P. gingivalis*-altered cecal microbiota recipient mice

**Supplementary table 5. Differentially abundant fungal (ITS) taxa in *P. gingivalis*-altered cecal microbiota recipient mice**
