# Supplementary material
Source: PubMed Central journal article supplement (PMC9353576)

**Supplemental Figure 1. *P. gingivalis*-altered gut microbiota does not affect % IL4<sup>+</sup> or IL17<sup>+</sup> or IFN- $\gamma$ <sup>+</sup> CD4<sup>+</sup> T cells**

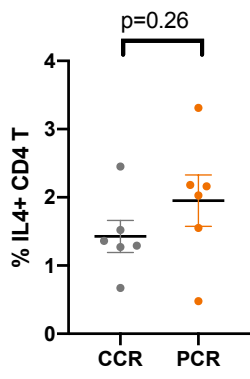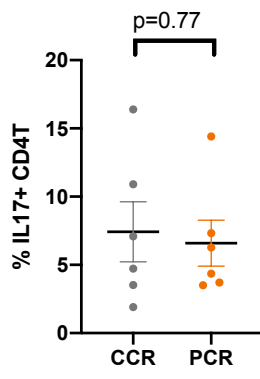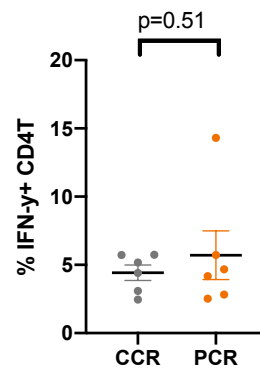

Supplement: NIHMS1825906-supplement-SupplMaterialFig_1.pdf [file NIHMS1825906-supplement-SupplMaterialFig_1.pdf]
